# Supplementary material for: Enzyme-independent functions of HDAC3 in the adult heart
Source: PubMed Central journal article supplement (PMC11722435; doi:10.1101/2024.12.29.630635), 2024-12-30
Supplement: NIHPP2024.12.29.630635V1-supplement-1.pdf [file NIHPP2024.12.29.630635V1-supplement-1.pdf]

702 **Supplemental Figure S1. Discrete cell-autonomous effects between HDAC3 depletion and HDAC**  
703 **enzyme inhibition in iPSC-derived cardiomyocytes (iPSC-CM).** (A) Western blot analysis of lysates from  
704 iPSC-CM with HDAC3 knock-down. (B-C) RT-qPCR analysis of the iPSC-CM with HDAC3 knock-down. n =  
705 4. (D-E) Western blot analysis of lysates from iPSC-CM administrated with 2 uM MS275 or SAHA at the  
706 indicated dosages, along with vehicle control (mock). (F-G) RT-qPCR analysis of the iPSC-CM treated with  
707 2 uM SAHA. All data are mean  $\pm$  S.E.M. \*  $p < 0.05$  by t-test.  
708

709 **Supplemental Figure S2. HDAC3-LAP2 $\beta$  interaction is not affected by HDIs or HDAC3-NCOR**  
710 **interaction.** (A) Co-immunoprecipitation analysis (co-IP) with the indicated antibodies of cell lysates from  
711 HEK293 cells transfected with indicated plasmids, followed by immunoblot (IB) with the indicated antibodies.  
712 (B) Co-IP analysis of HEK293 cells treated with 2 uM MS275 or SAHA. (C) Fatty acid oxidation (FAO) assay  
713 in AC16 cells infected with the indicated adenovirus vectors. Data are mean  $\pm$  S.E.M. \*  $p < 0.05$  by one-way  
714 ANOVA with Holm-Sidak's post hoc.  
715  
716  
717  
718  
719  
720  
721

## Figure S1

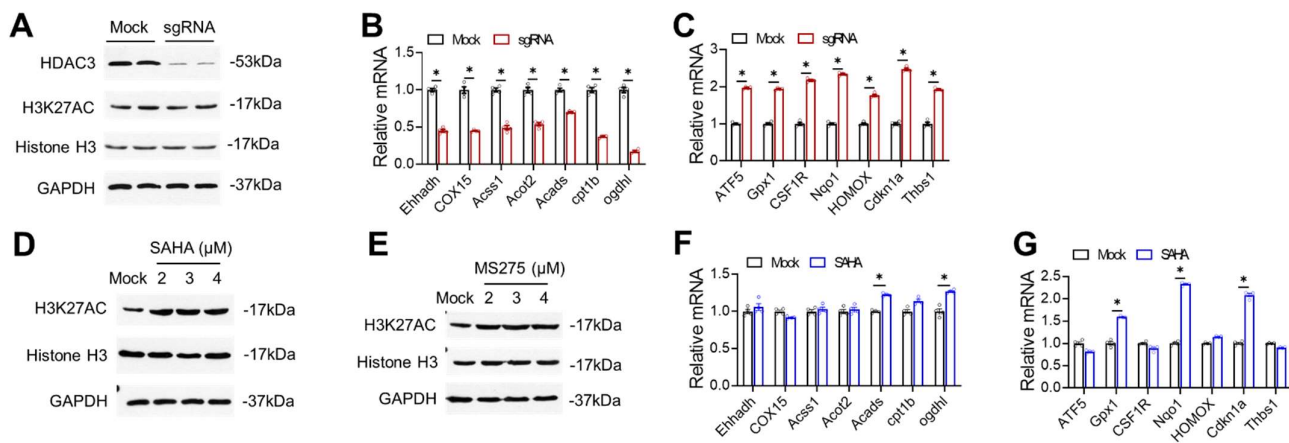

769  
770  
771  
772  
773  
774  
775  
776  
777  
778  
779  
780  
781  
782  
783  
784  
785  
786  
787  
788  
789  
790  
791  
792  
793  
794  
795  
796  
797  
798  
799  
800  
801  
802  
803  
804  
805  
806  
807  
808  
809  
810  
811  
812  
813

814

## Figure S2

**A**

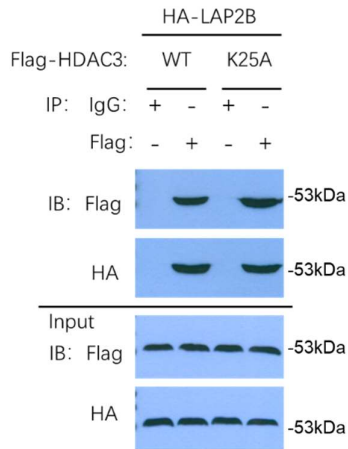

**B**

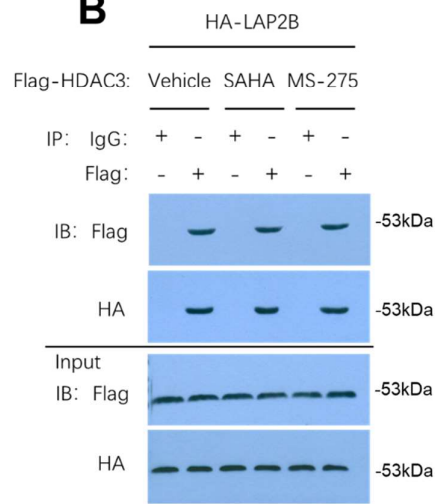

**C**

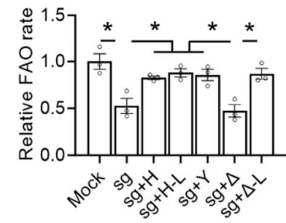

815  
816  
817  
818
